# Supplementary material for: Decreased peak expiratory flow rate associated with mortality in idiopathic pulmonary fibrosis: A preliminary report
Source: PubMed Central journal article supplement — Chron Respir Dis. 2022 Jul 6;19:14799731221114153. doi: 10.1177/14799731221114153 (PMC9272050; doi:10.1177/14799731221114153), 2022-07-06
Supplement: sj-pdf-1-crd-10.1177_14799731221114153.pdf [file sj-pdf-1-crd-10.1177_14799731221114153.pdf]

## Supplementary Material

### Decreased peak expiratory flow rate associated with mortality in idiopathic pulmonary fibrosis: A preliminary report

**Authors:** Kohei Fujita M.D.<sup>1</sup>, Hirotsugu Ohkubo M.D., Ph.D.<sup>1</sup>, Akiko Nakano M.D., Ph.D.<sup>2</sup>, Norihisa Takeda M.D., Ph.D.<sup>1</sup>, Kensuke Fukumitsu M.D., Ph.D.<sup>1</sup>, Satoshi Fukuda M.D., Ph.D.<sup>1</sup>, Yoshihiro Kanemitsu M.D., Ph.D.<sup>1</sup>, Takehiro Uemura M.D., Ph.D.<sup>1</sup>, Tomoko Tajiri M.D., Ph.D.<sup>1</sup>, Ken Maeno M.D., Ph.D.<sup>1</sup>, Yutaka Ito M.D., Ph.D.<sup>1</sup>, Tetsuya Oguri M.D., Ph.D.<sup>1</sup>, Yoshiyuki Ozawa M.D., Ph.D.<sup>3</sup>, Takayuki Murase M.D., Ph.D.<sup>4</sup>, and Akio Niimi M.D., Ph.D.<sup>1</sup>

#### **Institutional affiliations:**

<sup>1</sup> Department of Respiratory Medicine, Allergy and Clinical Immunology, Nagoya City University Graduate School of Medical Sciences, Nagoya, Japan.

<sup>2</sup> Department of Respiratory Medicine, Nagoya City University East Medical Center, Nagoya, Japan.

<sup>3</sup> Department of Radiology, Nagoya City University Graduate School of Medical Sciences, Nagoya, Japan.

1 <sup>4</sup> Department of Pathology and Molecular Diagnostics, Graduate School of Medical  
2 Sciences, Nagoya City University, Nagoya, Japan.

3

4 **Corresponding author:**

5 Hirotugu Ohkubo, Department of Respiratory Medicine Allergy and Clinical

6 Immunology, Nagoya City University Graduate School of Medical Sciences, 1

7 Kawasumi, Mizuho-cho, Mizuho-ku, Nagoya, Aichi 467-8601, Japan, **Fax:**

8 +81-52-852-0849, **Phone:** +81-52-853-8216, **E-mail:** [hohkubo@med.nagoya-cu.ac.jp](mailto:hohkubo@med.nagoya-cu.ac.jp)

9

1 **Supplementary Figure S1. Correlations of relative decline in PEFR.**

2 The correlations of relative decline in PEFR with relative decline in FVC (A) and

3 baseline FVC, % predicted (B) are shown.

4 Abbreviations: PEFR, peak expiratory flow rate; FVC, forced vital capacity.

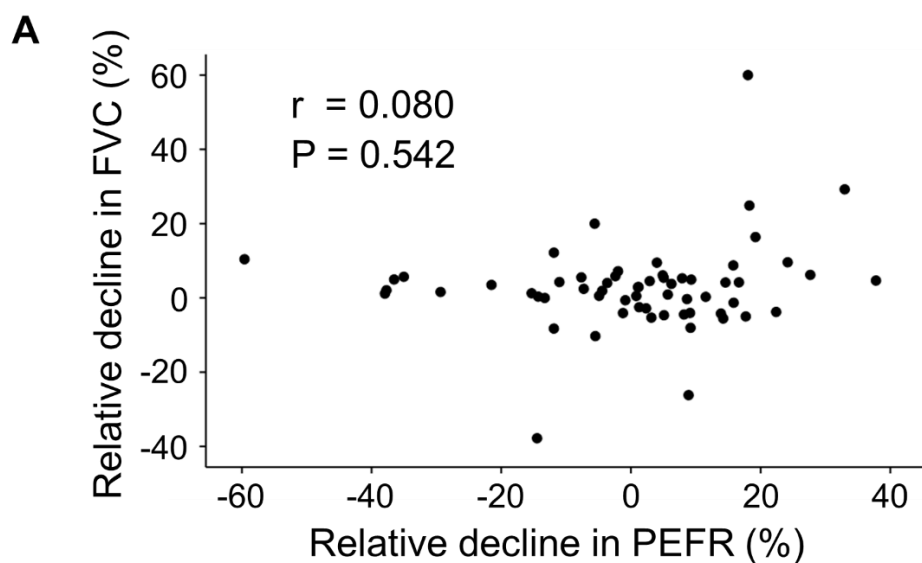

5

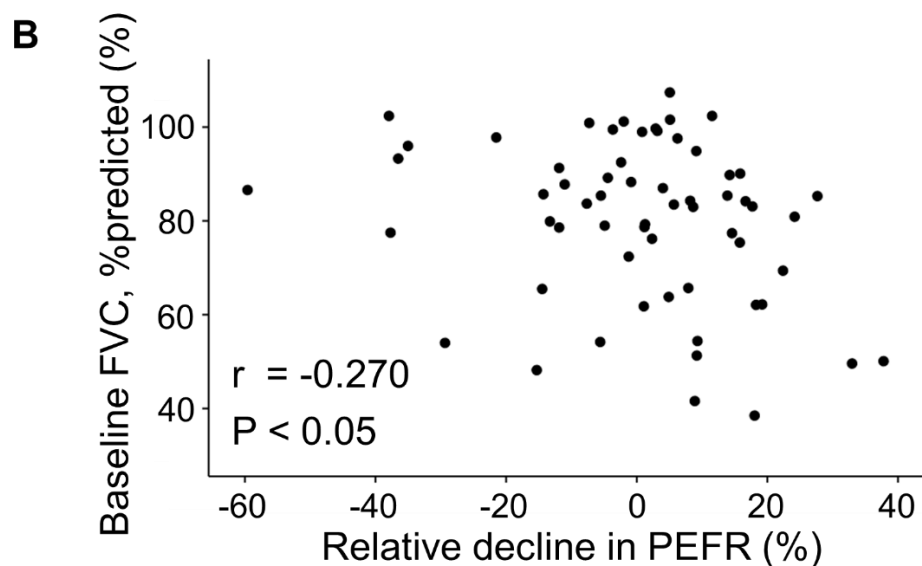

6

7

1 **Supplementary Table S1. Prediction of mortality by univariate and multivariate**

2 **Cox-proportional hazards analyses in the baseline cohort**

| <b>Predictor</b>                              | <b>HR</b> | <b>95%CI</b>  | <b>P-value</b> |
|-----------------------------------------------|-----------|---------------|----------------|
| <b>Univariate analysis</b>                    |           |               |                |
| Age                                           | 1.067     | 0.991 – 1.149 | 0.085          |
| Sex, female                                   | 0.780     | 0.182 – 3.356 | 0.739          |
| Body mass index                               | 0.859     | 0.742 – 0.995 | <0.05          |
| Baseline FVC, % predicted                     | 0.941     | 0.917 – 0.966 | <0.001         |
| Baseline PEFr, % predicted                    | 0.978     | 0.956 – 0.999 | 0.044          |
| Baseline FEV <sub>1</sub> , % predicted       | 0.947     | 0.919 – 0.977 | <0.001         |
| Baseline MMF, % predicted                     | 1.008     | 0.995 – 1.020 | 0.248          |
| Baseline DL <sub>CO</sub> , % predicted       | 0.973     | 0.952 – 0.995 | <0.05          |
| Baseline ESM <sub>CSA</sub> , cm <sup>2</sup> | 1.000     | 0.999 – 1.000 | 0.314          |
| <b>Multivariate analysis (Stepwise)</b>       |           |               |                |
| Baseline FVC, % predicted                     | 0.931     | 0.905 – 0.959 | <0.001         |

3

4 Abbreviations: HR, hazard ratio; CI, confidence interval; FVC, forced vital capacity;  
 5 PEFr, peak expiratory flow rate; FEV<sub>1</sub>, forced expiratory volume in 1.0 second; MMF,  
 6 maximum mid-expiratory flow rate; DL<sub>CO</sub>, diffusion capacity of the lung for carbon  
 7 monoxide; ESM<sub>CSA</sub>, the cross-sectional area of the erector spinae muscle evaluated  
 8 using CT images.

9

1 **Supplementary Table S2. Characteristics of IPF patients separated by the cutoff**

2 **value of relative decline in PEFR**

| Variable                                      | Relative decline in PEFR | Relative decline in PEFR | P-value |
|-----------------------------------------------|--------------------------|--------------------------|---------|
|                                               | ≥ 8.65%                  | < 8.65%                  |         |
| Total, n                                      | 21                       | 40                       |         |
| Age, y                                        | 72.5 ± 8.0               | 69.0 ± 7.7               | 0.103   |
| Sex, female, n (%)                            | 2 (9.5%)                 | 5 (12.5%)                | 0.544   |
| Body mass index, kg/m <sup>2</sup>            | 23.8 ± 3.4               | 23.6 ± 3.3               | 0.807   |
| Baseline FVC, % predicted, %                  | 77.4 [54.4 – 85.3]       | 86.2 [78.3 – 97.7]       | <0.05   |
| Baseline PEFR, % predicted, %                 | 72.8 [70.2 – 94.0]       | 82.5 [70.2 – 90.9]       | 0.687   |
| Baseline FEV <sub>1</sub> , % predicted, %    | 77.8 [60.1 – 85.3]       | 85.0 [75.8 – 94.3]       | <0.05   |
| Baseline FEV <sub>1</sub> /FVC, %             | 84.4 [78.7 – 91.0]       | 81.3 [76.8 – 86.5]       | 0.197   |
| Baseline MMF, % predicted, %                  | 83.1 [60.0 – 115.2]      | 82.2 [57.0 – 99.8]       | 0.585   |
| Baseline DL <sub>CO</sub> , % predicted, %    | 69.1 [55.1 – 79.2]       | 75.7 [54.8 – 86.9]       | 0.276   |
| Baseline ESM <sub>CSA</sub> , cm <sup>2</sup> | 29.4 ± 6.5               | 28.9 ± 6.4               | 0.827   |
| Observation period, days                      | 717 [498 – 1623]         | 1133 [702 – 1639]        | 0.278   |
| Death during observation period, n (%)        | 12 (57.1%)               | 9 (22.5%)                | <0.01   |
| Relative decline in FVC, %                    | 4.17 [-4.04 – 8.76]      | 2.26 [-0.15 – 5.33]      | 0.808   |
| Relative decline in PEFR, %                   | 15.85 [11.54 – 19.22]    | -4.04 [-13.54 – 2.49]    | <0.001  |
| Relative decline in FEV <sub>1</sub> , %      | 3.17 [-2.40 – 12.08]     | 3.27 [-1.46 – 8.22]      | 0.627   |
| Relative decline in MMF, %                    | 6.67 [-12.70 – 15.38]    | 3.58 [-13.12 – 17.10]    | 0.940   |
| Pirfenidone treatment, n (%)                  | 15 (71.4%)               | 26 (65.0%)               | 0.611   |
| Nintedanib treatment, n (%)                   | 18 (85.7%)               | 29 (72.5%)               | 0.201   |
| Corticosteroid treatment, n (%)               | 4 (19.0%)                | 9 (22.5%)                | 0.515   |
| Long-term oxygen therapy, n (%)               | 12 (57.1%)               | 14 (35.0%)               | 0.097   |
| Charlson comorbidity index                    | 2 [1 – 2]                | 1 [1 – 2]                | 0.365   |

3

4 Data are presented as means (± standard deviation), medians [interquartile range], or  
5 numbers (%).

6 Abbreviations: PEFR, peak expiratory flow rate; FVC, forced vital capacity; FEV<sub>1</sub>,

7 forced expiratory volume in 1.0 second; MMF, maximum mid-expiratory flow rate;

8 DL<sub>CO</sub>, diffusion capacity of the lung for carbon monoxide; ESM<sub>CSA</sub>, the cross-sectional

9 area of the erector spinae muscle evaluated using CT images.

1 **Supplementary Table S3. Characteristics of IPF patients with and without**  
2 **anti-fibrotic drugs**

| Variable                                      | With anti-fibrotic drugs | Without anti-fibrotic drugs | P-value |
|-----------------------------------------------|--------------------------|-----------------------------|---------|
| Total, n                                      | 54                       | 7                           |         |
| Age, y                                        | 70.4 ± 8.0               | 68.7 ± 7.8                  | 0.602   |
| Sex, female, n (%)                            | 7 (13.0%)                | 0 (0.0%)                    | 0.586   |
| Body mass index, kg/m <sup>2</sup>            | 23.8 ± 3.3               | 22.6 ± 3.7                  | 0.388   |
| Baseline FVC, % predicted, %                  | 83.1 [65.1 – 92.7]       | 86.6 [83.5 – 99.0]          | 0.168   |
| Baseline PEF <sub>R</sub> , % predicted, %    | 80.7 [66.6 – 92.9]       | 82.1 [75.9 – 94.0]          | 0.868   |
| Baseline FEV <sub>1</sub> , % predicted, %    | 83.3 [77.8 – 87.9]       | 82.1 [74.0 – 93.3]          | 0.991   |
| Baseline FEV <sub>1</sub> /FVC, %             | 83.6 [77.8 – 87.9]       | 75.8 [64.8 – 87.1]          | 0.083   |
| Baseline MMF, % predicted, %                  | 82.6 [61.1 – 103.6]      | 52.6 [32.8 – 115.8]         | 0.457   |
| Baseline DL <sub>CO</sub> , % predicted, %    | 71.7 [52.5 – 84.4]       | 87.9 [73.0 – 99.5]          | 0.072   |
| Baseline ESM <sub>CSA</sub> , cm <sup>2</sup> | 28.6 ± 6.1               | 32.2 ± 7.7                  | 0.164   |
| Observation period, days                      | 1005 [523 – 1775]        | 1248 [710 – 1533]           | 0.698   |
| Death during observation period, n (%)        | 21 (38.9%)               | 0 (0.0%)                    | 0.084   |
| Relative decline in FVC, %                    | 2.68 [-3.04 – 5.58]      | 0.91 [0.35 – 7.20]          | 1.000   |
| Relative decline in PEF <sub>R</sub> , %      | 3.59 [-6.01 – 13.97]     | -1.98 [-14.29 – 5.69]       | 0.190   |
| Relative decline in FEV <sub>1</sub> , %      | 3.18 [-2.44 – 9.17]      | 3.82 [-5.60 – 9.33]         | 0.851   |
| Relative decline in MMF, %                    | 2.11 [-13.10 – 16.20]    | 7.61 [-18.05 – 16.94]       | 0.868   |

3  
4 Data are presented as means (± standard deviation), medians [interquartile range], or  
5 numbers (%).

6 Abbreviations: FVC, forced vital capacity; PEF<sub>R</sub>, peak expiratory flow rate; FEV<sub>1</sub>,  
7 forced expiratory volume in 1.0 second; MMF, maximum mid-expiratory flow rate;  
8 DL<sub>CO</sub>, diffusion capacity of the lung for carbon monoxide; ESM<sub>CSA</sub>, the cross-sectional  
9 area of the erector spinae muscle evaluated using CT images.

10
